# Supplementary material for: Microcephaly models in the developing zebrafish retinal neuroepithelium point to an underlying defect in metaphase progression
Source: PubMed Central journal article supplement (PMC3814721; doi:10.1098/rsob.130065), 2013-10

Supplementary Figure 1

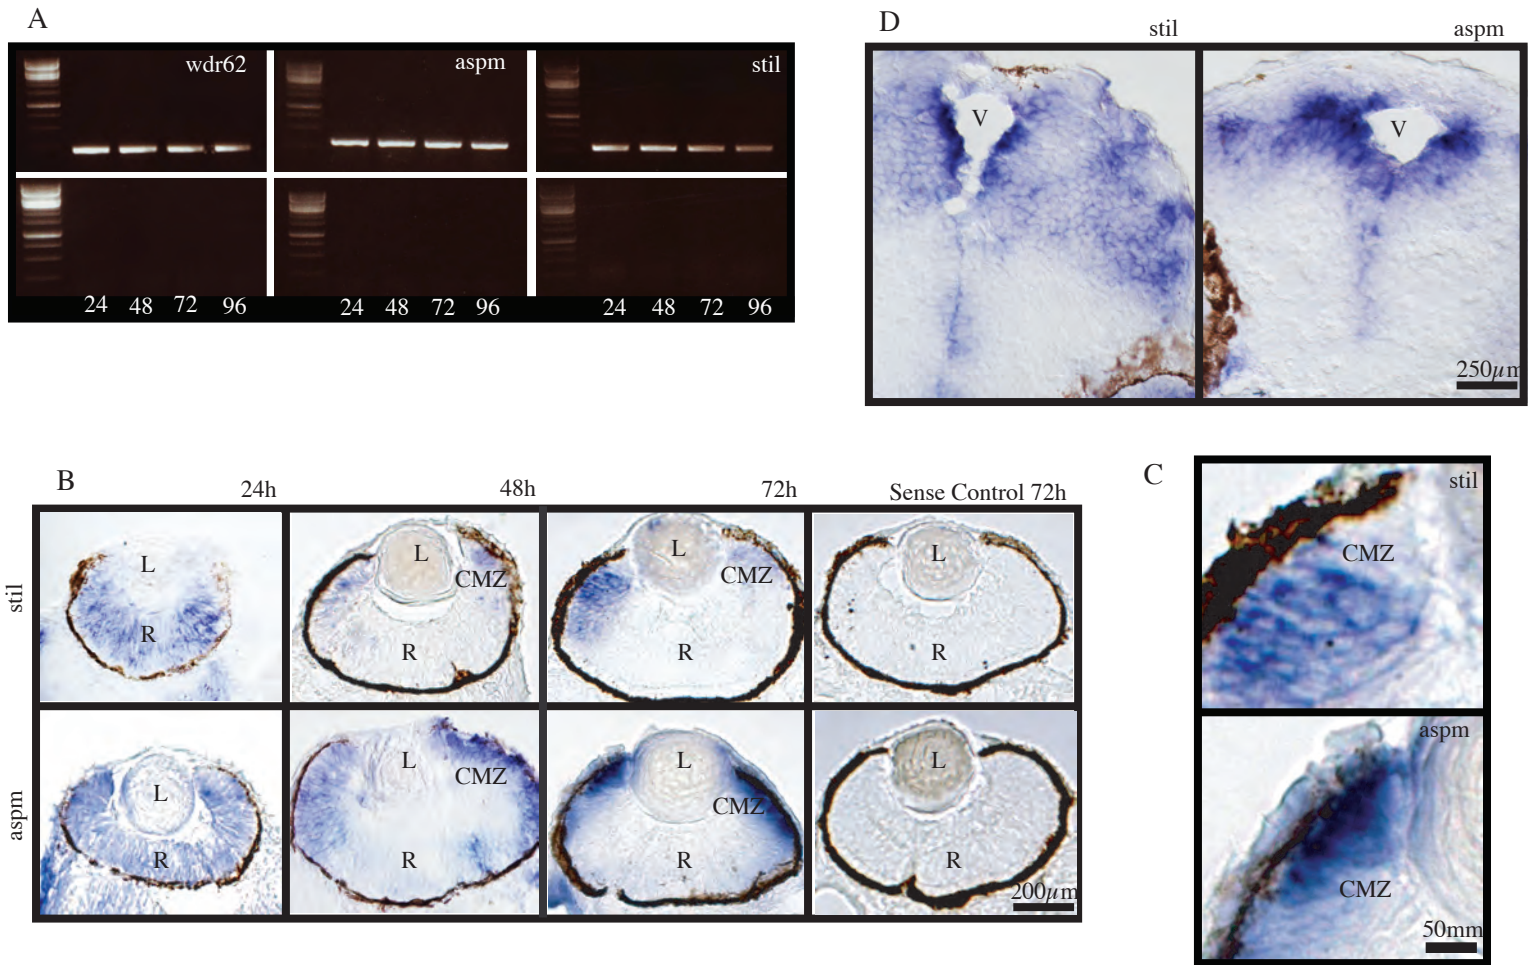

Supplement: rsob130065supp2.pdf [file rsob130065supp2.pdf]
