# Supplementary material for: Microcephaly models in the developing zebrafish retinal neuroepithelium point to an underlying defect in metaphase progression
Source: PubMed Central journal article supplement (PMC3814721; doi:10.1098/rsob.130065), 2013-10

Supplementary Figure 2

A

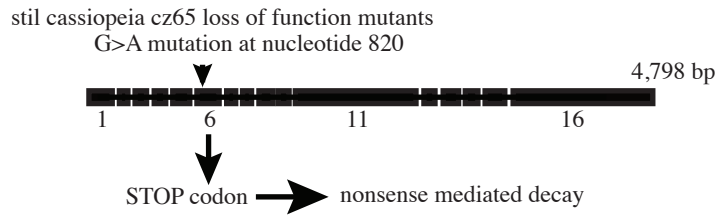

B

stil splice morpholino

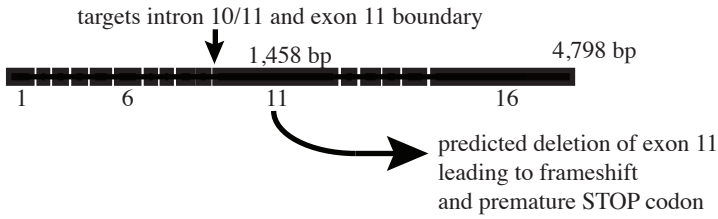

C

wdr62 splice morpholino

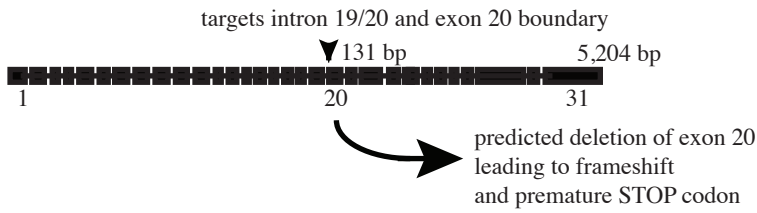

D

aspm splice morpholino

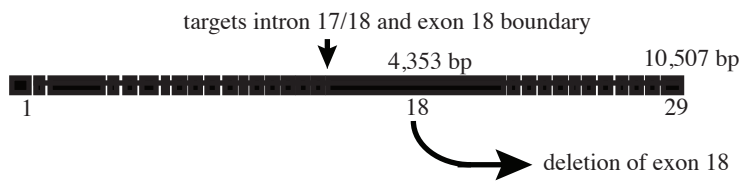

F

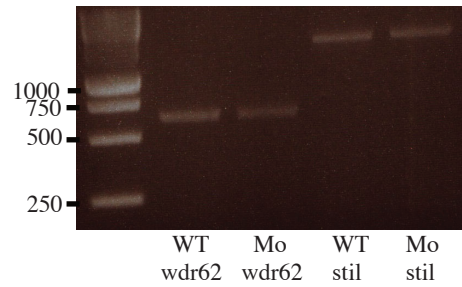

G

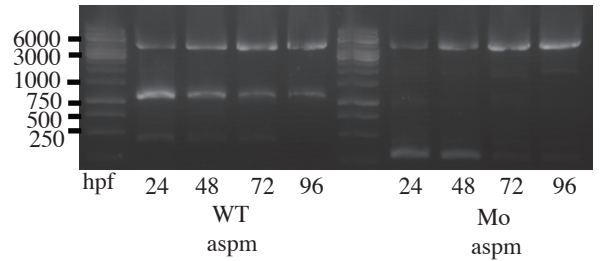

H

E  
odf2 splice morpholino

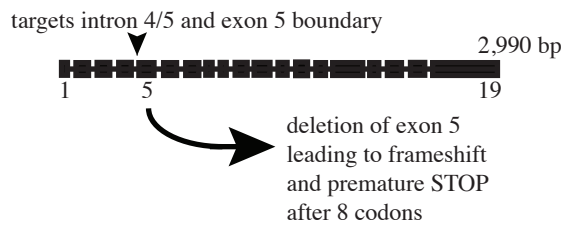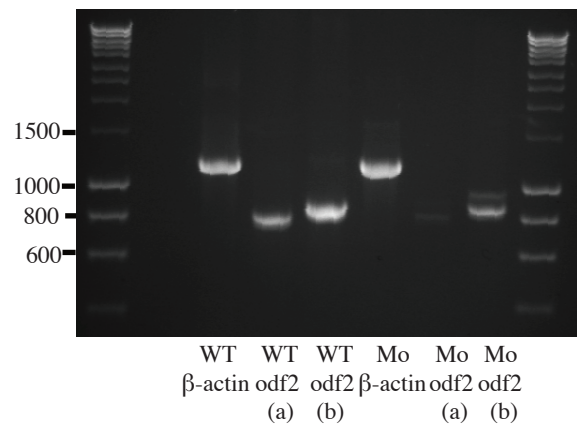

Supplement: rsob130065supp3.pdf [file rsob130065supp3.pdf]
